# Supplementary material for: Informed Consent in the Genomics Era
Source: PLOS journal article supplement (doi:10.1371/journal.pmed.0050192), 2008-09-12
Supplement: S2 (10.1371/journal.pmed.0050192.s002) [file journal.pmed.0050192.s002]

**Informed Consent in the Genomics Era**

- Genetische Kohortenstudien mit biologischem Material eröffnen vielversprechende Optionen für die medizinische Forschung. Sie werfen allerdings auch Probleme auf, die sich grundlegend von klassischen klinischen Studien unterscheiden für welche das bisherige Konzept von Einverständniserklärungen entwickelt wurde.
- Bei der klassischen Risiko-Nutzen-Analyse standen mögliche körperliche Schäden im Vordergrund, während nun Risiken wie die Nicht-Versicherbarkeit, Erwerbsunfähigkeit, genetische Diskriminierung oder Zerrüttung familiärer Beziehungen drohen.
- Die traditionelle Einverständniserklärungen erscheinen deshalb nicht geeignet für Langzeit-Studien mit biologischem Material.
- Informed Consent sollte vielmehr als Prozess zwischen Wissenschaftler und Studienteilnehmer verstanden werden wo es keine einmalige Entscheidung gibt, die ein für allemal und für alle möglichen Tests gilt.
- Auch Forschung die sich der anfänglichen Probenaufbewahrung anschliesst, sollte den Probanden erklärt werden, was mittlerweile über viele Kommunikationskanäle möglich ist.

*Mascalzoni D, Hicks A, Pramstaller P, Wjst M (2008) Informed consent in the genomics era. PLoS Med 5(9): e192. doi:10.1371/journal.pmed.0050192*
